# Supplementary material for: Active droplets in a hydrogel release drugs with a constant and tunable rate
Source: Royal Society of Chemistry journal article supplement (doi:10.1039/c9mh01822k), 2020-01-01
Supplement: c9mh01822k1.pdf [file c9mh01822k1.pdf]

Supporting information for:

## Active droplets in a hydrogel release drugs with a constant and tunable rate.

Caren Wanzke,<sup>a</sup> Marta Tena-Solsona,<sup>a</sup> Benedikt Rieß,<sup>a</sup> Laura Tebcharani,<sup>a</sup> Job Boekhoven<sup>a,b</sup>

---

<sup>a</sup> Chemistry Department, Technical University of Munich, Lichtenbergstr. 4, 85748, Garching. Email. job.boekhoven@tum.de

<sup>b</sup> Institute for Advanced Study, Technical University of Munich, Lichtenbergstr. 2a, 85748, Garching

† Electronic Supplementary Information (ESI) available: [details of any supplementary information available should be included here]. See DOI: 10.1039/x0xx00000x

## Materials and methods

**Materials.** We purchased (*E/Z*)-2-Buten-1-ylsuccinic anhydride (C<sub>4</sub> anhydride), (*E/Z*)-2-hexen-1-ylsuccinic anhydride (C<sub>6</sub> anhydride), (*E/Z*)-2-decen-1-ylsuccinic anhydride (C<sub>10</sub> anhydride) from TCI Chemicals. (*E/Z*)-2-Octen-1-ylsuccinic anhydride (C<sub>8</sub> anhydride), 1-ethyl-3-(3-dimethylaminopropyl) carbodiimide (EDC), 2-(*N*-morpholino)ethanesulfonic acid (MES) buffer, trifluoroacetic acid (TFA) and Nile Red were purchased from Sigma-Aldrich and used without any further purification unless otherwise indicated. HPLC grade acetonitrile (ACN) was purchased from VWR. We purchased Agar-agar from Carl-Roth and synthesized the succinic acid derivatives (C<sub>4</sub>-C<sub>10</sub>) as described below.

**Synthesis of the succinic acid derivatives.** We synthesized the precursor acids by treating the corresponding anhydrides with two (mass)-equivalents of MQ water and stirred overnight at room temperature. We found no starting material by HPLC. We lyophilized the mixture, and it stored at -20 °C until further use.

**Sample preparation.** We prepared stock solutions of the precursors by dissolving the acid in 0.2 M MES buffer, after which we adjusted the pH to pH 6.0, 7.4 or 8.0. Stock solutions of EDC were prepared by dissolving the EDC powder in MQ water. We prepared the stock solutions of 1.0 M EDC freshly. Reaction cycles were started by addition of the high concentration EDC to the acid solution. We carried out all experiments at 25 (±0.5), 37 (±0.5) or 45 (±0.5) °C

**Kinetic model.** We used a kinetic model for predicting the evolution of the anhydride concentration over time. Supporting Notes 1 describes the model briefly. More details can be found in our previous work.<sup>1</sup> The rate constants we used in this work are given in Supporting Table S3.

**HPLC.** We monitored the kinetics of the chemical reaction cycles over time by analytical HPLC (HPLC, ThermoFisher Dionex Ultimate 3000, Hypersil Gold 250 x 4.8 mm). A 1.0 mL sample was prepared as described above and placed into a screw cap HPLC vial. Samples of the solutions were directly injected without further dilution (injection volume: 25 µL) and tracked with a UV/Vis detector at 220 and 240 nm. All compounds involved were separated using a linear gradient of H<sub>2</sub>O: ACN each with 0.1% TFA.

Method 1: H<sub>2</sub>O: ACN from 40:60 to 2:98 in 8 min for C<sub>4</sub> and C<sub>6</sub>; Method 2: H<sub>2</sub>O: ACN from 98:2 to 2:98 in 12 min for C<sub>8</sub> and C<sub>10</sub>;

Both methods were followed by 2 min 98% ACN. Calibration curves for the EDC (in MQ water), acids (in MES buffer), anhydrides (in ACN) and drugs (in ACN or MQ-water) were performed with the corresponding method in triplicate. Retention times and calibration values are given in Supporting Table S1, S2 and S4.

**UV/Vis Spectroscopy.** The UV/Vis measurements were carried out using a Multiskan FC (ThermoFisher) microplate reader. Samples (200 µL) were directly prepared into a 96 well-plate (tissue culture plate non-treated). The Temperature (25 (±0.5), 37 (±0.5) or 45 (±0.5) °C) was set 30 min before starting the measurement. Each experiment was performed at 500 nm and in triplicate.

**Confocal Fluorescence Microscopy.** We used a Leica SP5 confocal microscope using a 63x oil immersion objective to image the droplets. We prepared samples as described above but with 25 µM Nile Red as s dye. 20 µL of the sample was deposited on a PEG-coated glass slide and covered with a 12 mm diameter coverslip. Samples were excited with 543 nm laser and imaged at 580-700 nm.

**Fluorescence Microscopy.** We used a Leica DMI8 inverted wide-field microscope (63x Oil objective) with TXR filter (Exc. 540-580; Em. 592-668; DC 585). The samples were prepared as described above for the confocal fluorescence microscopy.

**ESI.** We used a Varian 500 MS LC ion trap to perform ESI-MS measurements. The samples were diluted in acetonitrile before injection into an acetonitrile carrier flow (20 µL min<sup>-1</sup>).

**Nile Red Assay.** The Nile Red assay was performed on a Jasco (FP-8300) spectrofluorometer with external temperature control (MCB-100). Samples were directly prepared in the 10 mm quartz cuvette (Precision Cells Inc.) by mixing different concentrations of precursor (from 0.01 to 100 mM in 0.2 M MES buffer) with Nile Red (5  $\mu$ M). The fluorescence intensities were measured at 635 nm with an excitation at 550 nm. The corresponding blue shift was calculated by subtracting the intensity of the blank (0.2 M MES buffer with 5  $\mu$ M Nile Red) from the corresponding sample.

**Drug Release Experiments.** A 2% agar-agar stock in 0.2 M MES buffer pH 6.0 was heated to 90 °C. For the first-order release experiments, X  $\mu$ L of a 5 mM stock solution of the drug (in acetonitrile for Nimesulide/Nitrendipine, in dimethylsulfoxide for Acyclovir) was added to 500  $\mu$ L 7.5 mM C<sub>10</sub> precursor in 0.2 M MES buffer pH 6.0. 500  $\mu$ L of the hot agar was added, and 60  $\mu$ L of this mixture was immediately put on the bottom of a 96 well plate. After 1 min 120  $\mu$ L of 0.2 M MES buffer was added as a supernatant. The release of precursor and drug to the supernatant was measured via HPLC. For every HPLC injection, a separate well was prepared. For the zero-order release experiments, the precursor solution was activated as described above. The drug was added after 30 min and agar after 45 min. We carried out the rest of the experiment as described above.

**Spin Down Experiments.** 500  $\mu$ L of the precursor solution was activated as described above. After 30 min, X  $\mu$ L of a 5 mM stock solution of the drug (in acetonitrile for Nimesulide/Nitrendipine, in dimethylsulfoxide for Acyclovir) was added. One hour in the experiment, the solution was put in a centrifuge for 5 min (rcf = 5.5). The aqueous phase (200  $\mu$ L) was measured by HPLC to determine the amount of drug left.

## Supporting Tables

**Supporting Table S1.** Characterization of precursors.

| name                       | structure                                                                         | mass calculated<br>[g/mol]                                                  | mass observed<br>[g/mol]     | retention time<br>[min] @220nm | calibration value<br>(mAU/mM) |
|----------------------------|-----------------------------------------------------------------------------------|-----------------------------------------------------------------------------|------------------------------|--------------------------------|-------------------------------|
| <b>C<sub>4</sub> acid</b>  | 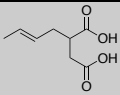 | Mw = 172.1<br>C <sub>8</sub> H <sub>12</sub> NO <sub>4</sub>                | 171.1<br>[Mw-H] <sup>-</sup> | 4.16<br>(method 1)             | 2.83                          |
| <b>C<sub>6</sub> acid</b>  |  | Mw = 200.1<br>C <sub>10</sub> H <sub>16</sub> N <sub>2</sub> O <sub>4</sub> | 199.1<br>[Mw-H] <sup>-</sup> | 5.60<br>(method 1)             | 2.78                          |
| <b>C<sub>8</sub> acid</b>  |  | Mw = 228.1<br>C <sub>12</sub> H <sub>24</sub> NO <sub>4</sub>               | 227.1<br>[Mw-H] <sup>-</sup> | 10.96<br>(method 2)            | 3.22                          |
| <b>C<sub>10</sub> acid</b> |  | Mw = 256.2<br>C <sub>14</sub> H <sub>24</sub> NO <sub>4</sub>               | 255.1<br>[Mw-H] <sup>-</sup> | 11.83<br>(method 2)            | 3.25                          |

**Supporting Table S2.** Characterization of products.

| name                            | structure                                                                           | mass calculated<br>[g/mol]                                                  | mass observed<br>[g/mol]     | retention time<br>[min] @220nm | calibration value<br>(mAU/mM) |
|---------------------------------|-------------------------------------------------------------------------------------|-----------------------------------------------------------------------------|------------------------------|--------------------------------|-------------------------------|
| <b>C<sub>4</sub> anhydride</b>  | 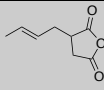  | Mw = 154.1<br>C <sub>8</sub> H <sub>10</sub> NO <sub>3</sub>                | 155.2<br>[Mw+H] <sup>+</sup> | 6.68<br>(method 1)             | 4.78                          |
| <b>C<sub>6</sub> anhydride</b>  |  | Mw = 182.1<br>C <sub>10</sub> H <sub>14</sub> N <sub>2</sub> O <sub>3</sub> | 183.1<br>[Mw+H] <sup>+</sup> | 7.78<br>(method 1)             | 5.19                          |
| <b>C<sub>8</sub> anhydride</b>  |  | Mw = 210.1<br>C <sub>12</sub> H <sub>18</sub> NO <sub>3</sub>               | 211.2<br>[Mw+H] <sup>+</sup> | 12.84<br>(method 2)            | 5.04                          |
| <b>C<sub>10</sub> anhydride</b> |  | Mw = 238.2<br>C <sub>12</sub> H <sub>11</sub> NO <sub>5</sub>               | 239.2<br>[Mw+H] <sup>+</sup> | 13.39<br>(method 2)            | 5.48                          |

**Supporting Table S3:** Rate constants used in the kinetic model.

| precursor                  | k <sub>1</sub><br>[M <sup>-1</sup> s <sup>-1</sup> ] | k <sub>2</sub>   | k <sub>3</sub>      | k <sub>4</sub><br>[s <sup>-1</sup> ] | CAC<br>[mM] |
|----------------------------|------------------------------------------------------|------------------|---------------------|--------------------------------------|-------------|
| <b>C<sub>4</sub> acid</b>  | 0.2                                                  | 1xk <sub>1</sub> | 0.25xk <sub>1</sub> | 3.5*10 <sup>-3</sup>                 | 40          |
| <b>C<sub>6</sub> acid</b>  | 0.2                                                  | 1xk <sub>1</sub> | 0.25xk <sub>1</sub> | 3.5*10 <sup>-3</sup>                 | 3.5         |
| <b>C<sub>8</sub> acid</b>  | 0.2                                                  | 1xk <sub>1</sub> | 0.25xk <sub>1</sub> | 3.5*10 <sup>-3</sup>                 | 0.3         |
| <b>C<sub>10</sub> acid</b> | 0.2                                                  | 1xk <sub>1</sub> | 0.25xk <sub>1</sub> | 3.5*10 <sup>-3</sup>                 | 0.03        |

**Supporting Table S4:** Characterization of drugs.

| name                | structure                                                                         | mass calculated<br>[g/mol]                                                     | mass observed<br>before the<br>cycle<br>[g/mol] | mass observed<br>after the cycle<br>[g/mol] | retention<br>time<br>[min]      | calibration<br>value<br>(mAU/mM) |
|---------------------|-----------------------------------------------------------------------------------|--------------------------------------------------------------------------------|-------------------------------------------------|---------------------------------------------|---------------------------------|----------------------------------|
| <b>Nimesulide</b>   | 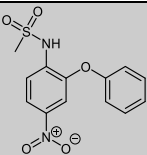 | Mw = 308.31<br>C <sub>13</sub> H <sub>12</sub> N <sub>2</sub> O <sub>5</sub> S | 307.0<br>[Mw-H] <sup>-</sup>                    | 307.0<br>[Mw-H] <sup>-</sup>                | 11.10<br>(220 nm)<br>(method 2) | 0.340                            |
| <b>Nitrendipine</b> |  | Mw = 360.36<br>C <sub>18</sub> H <sub>20</sub> N <sub>2</sub> O <sub>6</sub>   | 359.1<br>[Mw-H] <sup>-</sup>                    | 359.2<br>[Mw-H] <sup>-</sup>                | 11.48<br>(240 nm)<br>(method 2) | 0.530                            |
| <b>Acyclovir</b>    |  | Mw = 225.21<br>C <sub>8</sub> H <sub>11</sub> N <sub>5</sub> O <sub>3</sub>    | 248.1<br>[Mw+Na] <sup>+</sup>                   | 248.1<br>[Mw+Na] <sup>+</sup>               | 5.38<br>(240 nm)<br>(method 2)  | 0.192                            |

**Supporting Table S5:** Percentage of Nimesulide measurable in the aqueous phase after 1h for 7.5 mM C<sub>10</sub> with different amounts of EDC and different initial concentrations of Nimesulide. The error depicts the standard deviation (n=3).

| EDC<br>[mM] | c (Nimesulide) [μM] |              |              |
|-------------|---------------------|--------------|--------------|
|             | 50                  | 100          | 150          |
| 7.5         | 19.5 ± 1.2 %        | 24.0 ± 3.2 % | 19.0 ± 8.8 % |
| 10          | 14.5 ± 0.7 %        | 19.2 ± 1.1 % | 17.1 ± 0.3 % |
| 15          |                     | 17.7 ± 1.5 % | 15.2 ± 1.2 % |

## Supporting Notes

### Supporting Notes 1. Description of kinetic model

A kinetic model was written in Matlab that described each reaction involved in the chemical reaction network. The concentrations of each reactant were calculated for every 1 second in the cycle. The model was used to the obtained fit HPLC data that described the evolution of the concentration of anhydride, EDC and acid over time. The concentration of the C<sub>4</sub>-, C<sub>6</sub>-, C<sub>8</sub>-precursor was 10 mM and of the C<sub>10</sub>-precursor was 7.5 mM.

The model described five chemical reactions:

Direct hydrolysis of carbodiimide with a first order rate constant of  $1.3 \times 10^{-5} \text{ sec}^{-1}$  as determined in previous work.<sup>1</sup>

The formation of O-acylisourea by reaction with EDC ( $k_1$ ). This second order rate constant was determined for each precursor by HPLC, by monitoring the EDC consumption.

The formation of the anhydride with a first order rate constant. This rate constant could not be determined because the O-acylisourea was never observed. It was therefore set to be twice the rate of  $k_1$ . As a result, the O-acylisourea did never reach concentrations over 1  $\mu\text{M}$  in the model.

Direct hydrolysis of O-acylisourea ( $k_3$ ). This reaction rate could not be obtained because the O-acylisourea was not observed. The ratio of  $k_2$  and  $k_3$  (anhydride formation and competing direct hydrolysis of O-acylisourea) was varied to fit the HPLC data for several concentrations of  $[\text{fuel}]_0$  and  $[\text{di-acid}]_0$ .

Hydrolysis of anhydride in solution proceeded with a first order rate ( $k_4$ ) The rate constant was determined by HPLC for kinetic experiments where no assemblies were reached.

The rate of the hydrolysis reaction was calculated by multiplying the first order rate constant  $k_4$  with the concentration of anhydride. When the concentration reached values above the CAC, the hydrolysis rate was calculated by multiplying the rate constant by the CAC.

### Supporting Notes 2. Preparation of the activated gels.

The behavior of our droplets is sensitive to temperature (Fig. 3e). We thus explain here the preparation of the gels with active droplets for the drug release experiments in more detail.

We ensure that the solution of droplets was kept at room temperature until the agar gel was added. We add 500  $\mu\text{L}$  of the liquified agar gel at 90°C to 500  $\mu\text{L}$  of emulsion at 25°C in an Eppendorf tube. The total solution of 1000  $\mu\text{L}$  can, theoretically, never exceed a temperature between 55 and 60°C when mixing is done rapidly. This estimation is a high estimate because it does not take into account the thermal capacity of the walls of the tube, or the pipet tips. Then, immediately after mixing, we pipette 60  $\mu\text{L}$  of the solution on the bottom of a well in a 96 well-plate which is at room temperature. There it directly solidifies because of the further drop in temperature. Taken together, the upper temperature of the droplets is significantly below 60°C, and it experiences this temperature for less than a minute. In that minute, we assume that the droplet do not hydrolyze significantly faster than the rest of the experiment.

## Supporting Figures

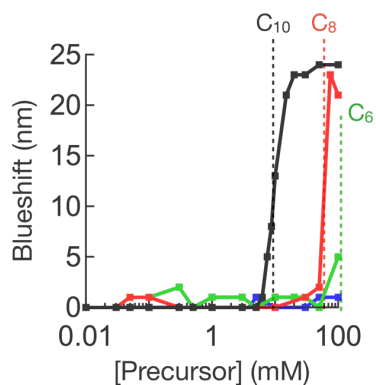

**Fig. S1.** Nile Red Assay at fluorescence spectroscopy for precursor  $C_6$ ,  $C_8$  and  $C_{10}$ .

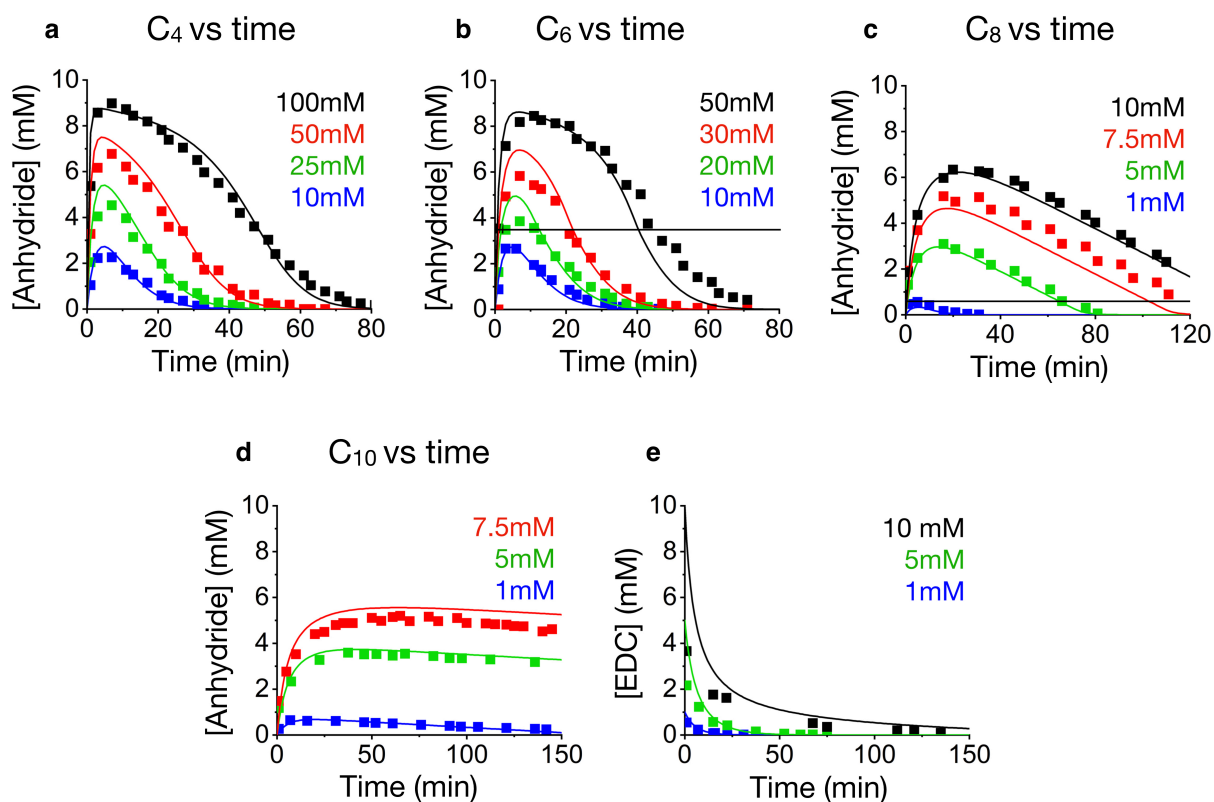

**Fig. S2.** HPLC kinetics for different precursor with different concentrations EDC, markers represent HPLC data, while lines represent the kinetic model **a)** 10 mM  $C_4$  acid **b)** 10 mM  $C_6$  acid **c)** 10 mM  $C_8$  acid and **d)** 7.5 mM  $C_{10}$  acid; EDC consumption of **e)** 7.5 mM  $C_{10}$  acid with different concentrations of EDC.

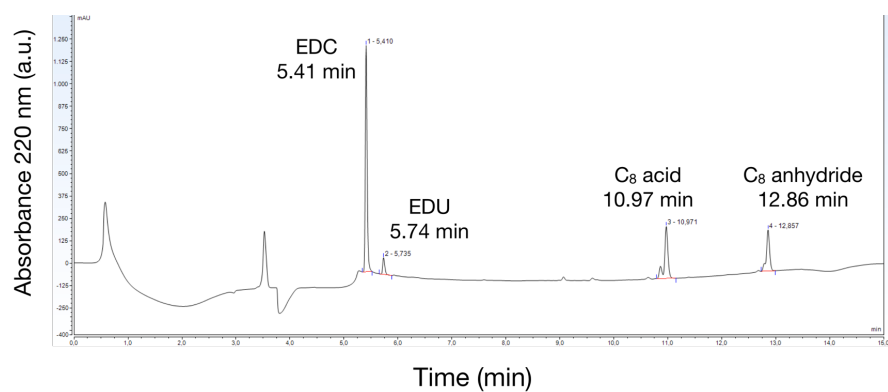

**Fig. S3.** Representative HPLC trace of 10 mM C<sub>8</sub> acid after 15 min of EDC addition (5 mM).

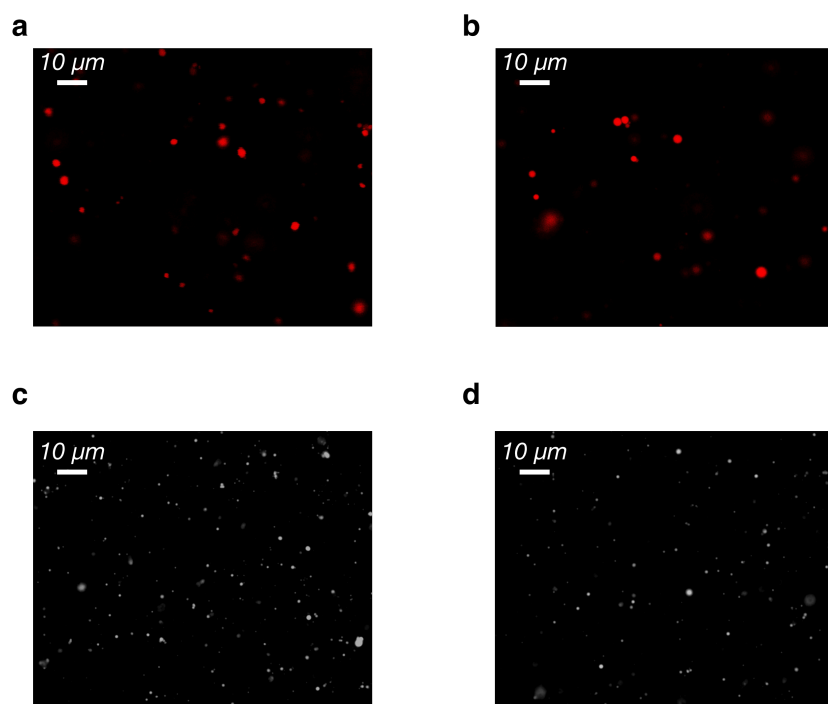

**Fig. S4.** Confocal micrographs of 7.5mM C<sub>10</sub> acid with 10mM EDC **a)** directly before gel addition (44min) and **b)** directly after gel addition (46min). Fluorescence micrographs of 7.5mM C<sub>10</sub> acid with 10mM EDC **c)** with 50 μM Nimesulide and **d)** with 200 μM Nimesulide both directly after gel addition.



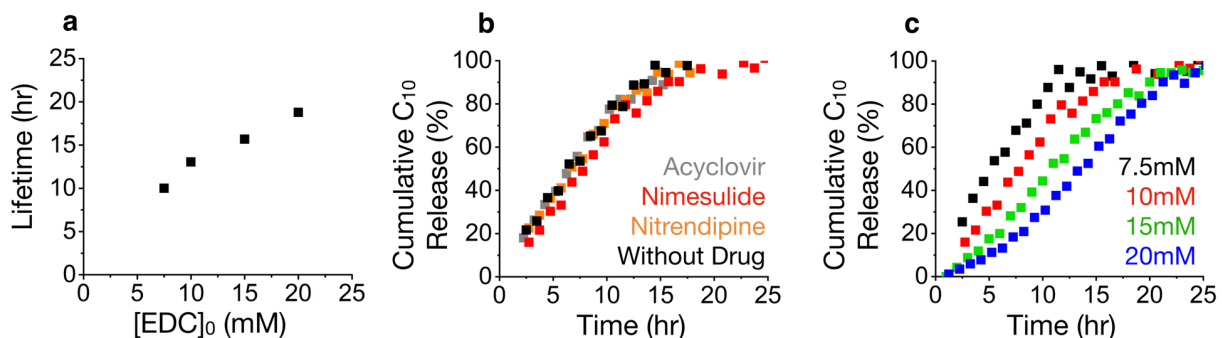

**Fig. S5.** **a)** Lifetimes of the active emulsion in gel vs. starting concentrations EDC determined by UV/Vis. Cumulative  $C_{10}$  release measured by HPLC from the active emulsion following zero-order release for **b)** 7.5mM  $C_{10}$  acid with 50  $\mu$ M of different drugs or without drug with 10mM starting concentration EDC **c)** 7.5 mM  $C_{10}$  acid with different starting concentrations EDC. All release profiles are measured in a 1% agar gel at pH 6.0 and 25  $^{\circ}$ C.

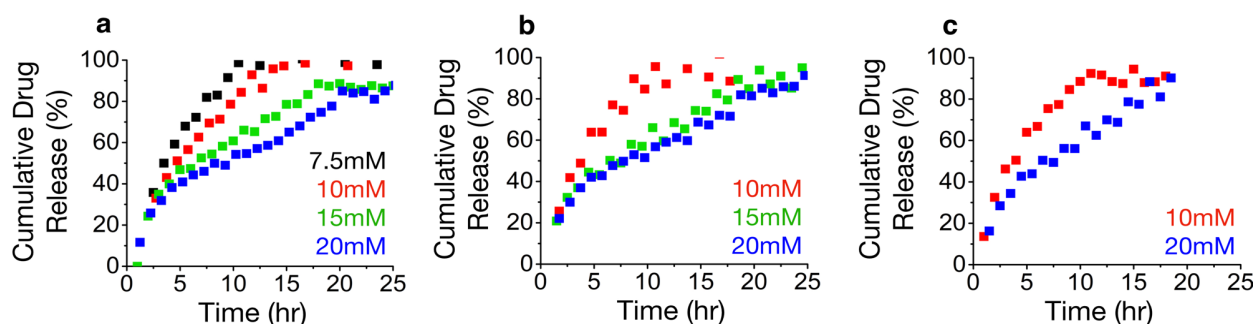

**Fig. S6.** Cumulative drug release measured by HPLC from the active emulsion following zero-order release for **a)** 50  $\mu$ M Nimesulide with different starting concentrations EDC, **b)** 100  $\mu$ M Nimesulide with different starting concentrations EDC, **c)** 200  $\mu$ M Nimesulide with different starting concentrations EDC. All release profiles are measured in a 1% agar gel at pH 6.0 and 25  $^{\circ}$ C.

## References

<sup>1</sup> Tena-Solsona, M.; Rieß, B.; Grötsch, R. K.; Löhner, F. C.; Wanzke, C.; Käsdorf, B.; Bausch, A. R.; Müller-Buschbaum, P.; Lieleg, O.; Boekhoven, J., Non-equilibrium dissipative supramolecular materials with a tunable lifetime. *Nature Communications* **2017**, *8*, 15895.
